# Supplementary material
Source: HighWire-hosted journal article supplement (https://erj.ersjournals.com/content/60/2/2102548)
Supplement: inline-supplementary-material-1 [file inline-supplementary-material-1.pdf]

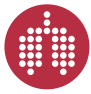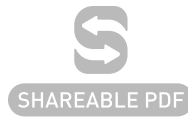

# Echocardiographic probability of pulmonary hypertension: a validation study

Michele D'Alto <sup>1</sup>, Marco Di Maio <sup>2</sup>, Emanuele Romeo <sup>1</sup>, Paola Argiento <sup>1</sup>, Ettore Blasi <sup>1</sup>,  
Alessandro Di Vilio <sup>1</sup>, Gaetano Rea <sup>3</sup>, Antonello D'Andrea <sup>4</sup>, Paolo Golino <sup>1</sup> and Robert Naeije <sup>5</sup>

<sup>1</sup>Dept of Cardiology, University "L. Vanvitelli" – Monaldi Hospital, Naples, Italy. <sup>2</sup>Dept of Medicine, Surgery and Dentistry, University of Salerno, Baronissi, Italy. <sup>3</sup>Radiology Unit, Monaldi Hospital, Naples, Italy. <sup>4</sup>Unit of Cardiology and Intensive Coronary Care, "Umberto I" Hospital, Nocera Inferiore, Italy. <sup>5</sup>Dept of Pathophysiology, Free University of Brussels, Brussels, Belgium.

Corresponding author: Michele D'Alto ([mic.dalto@tin.it](mailto:mic.dalto@tin.it))

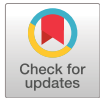

Shareable abstract (@ERSpublications)

**Echocardiography with measurement of direct and indirect signs as suggested by the 2015 ESC/ERS guidelines can still be used to assess the probability of pulmonary hypertension and pulmonary vascular disease according to renewed definitions** <https://bit.ly/3m9w45k>

**Cite this article as:** D'Alto M, Di Maio M, Romeo E, *et al.* Echocardiographic probability of pulmonary hypertension: a validation study. *Eur Respir J* 2022; 60: 2102548 [DOI: 10.1183/13993003.02548-2021].

This single-page version can be shared freely online.

## Abstract

**Background** According to current guidelines, the diagnosis of pulmonary hypertension (PH) relies on echocardiographic probability followed by right heart catheterisation (RHC). How echocardiography predicts PH recently redefined by mean pulmonary arterial pressure (mPAP) >20 mmHg instead of ≥25 mmHg and pulmonary vascular disease defined by pulmonary vascular resistance (PVR) ≥3 or >2 WU has not been established.

**Methods** A total of 278 patients referred for PH underwent comprehensive echocardiography followed by RHC. 15 patients (5.4%) were excluded because of insufficient quality echocardiography.

**Results** With PH defined by mPAP >20 mmHg, 23 patients had no PH, 146 had pre-capillary PH and 94 had post-capillary PH. At univariate analysis, maximum tricuspid regurgitation velocity (TRV) 2.9–3.4 m·s<sup>-1</sup>, left ventricle (LV) eccentricity index >1.1, right ventricle outflow tract acceleration time (RVOT-AT) <105 ms or notching, RV/LV basal diameter >1 and pulmonary artery diameter predicted PH, whereas inferior vena cava diameter and right atrial area did not. At multivariable analysis, only TRV ≥2.9 m·s<sup>-1</sup> independently predicted PH. Additional independent prediction of PVR ≥3 WU was offered by LV eccentricity index >1.1, and RVOT-AT <105 ms and/or notching, but with no improvement of optimal combination of specificity and sensitivity or positive prediction.

**Conclusions** Echocardiography as recommended in current guidelines can be used to assess the probability of redefined PH in a referral centre. However, the added value of indirect signs is modest and sufficient quality echocardiographic signals may not be recovered in some patients.

Copyright ©The authors 2022.  
For reproduction rights and  
permissions contact  
[permissions@ersnet.org](mailto:permissions@ersnet.org)

This article has an editorial  
commentary:  
[https://doi.org/10.1183/  
13993003.00481-2022](https://doi.org/10.1183/13993003.00481-2022)

Received: 22 Sept 2021  
Accepted: 10 Dec 2021
